# Supplementary material for: Effects of early enteral nutrition supplemented with collagen peptides on post-burn inflammatory responses in a mouse model
Source: Royal Society of Chemistry journal article supplement (doi:10.1039/c7fo00181a), 2017-01-01
Supplement: c7fo00181a1.pdf [file c7fo00181a1.pdf]

## Supplementary information

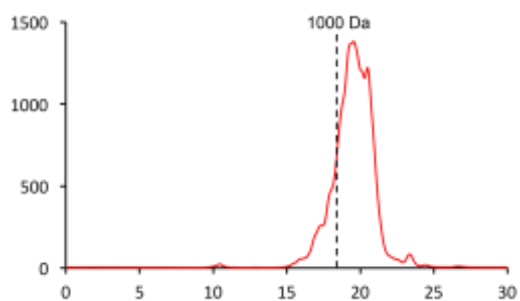

Fig. S1 Molecular weight distribution of Alaska pollock skin derived collagen peptides.

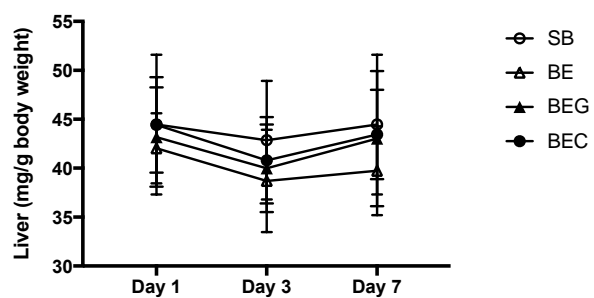

Fig. S2 Liver index change of mice in sham burn (SB), burn + basic enteral nutrition (BE), burn + basic enteral nutrition + glutamine (BEG) and burn + basic enteral nutrition + collagen peptides (BEC) groups over the 7-day study period. Data are presented as mean  $\pm$  SD, n=8.

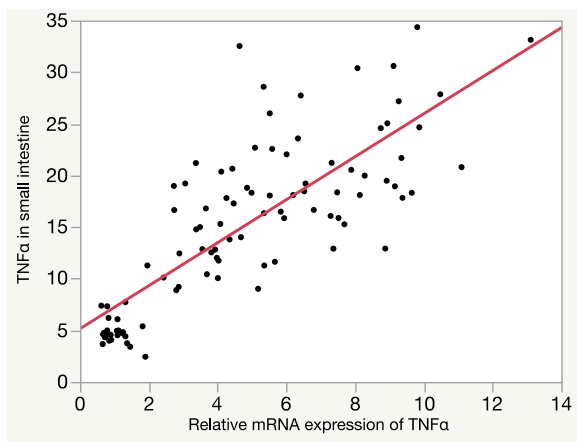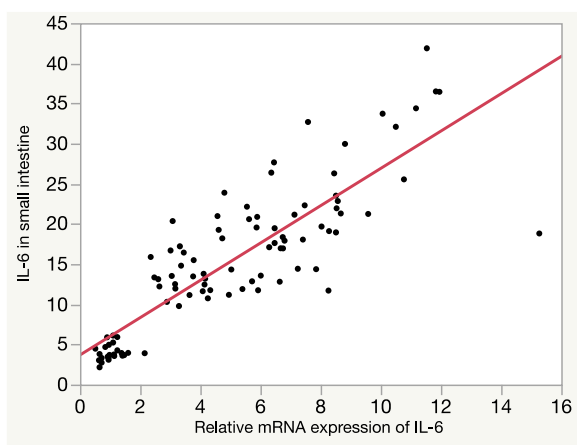

Fig. S3 Bivariate fit of intestinal TNF $\alpha$  and IL-6 by their relative mRNA expression correspondingly.

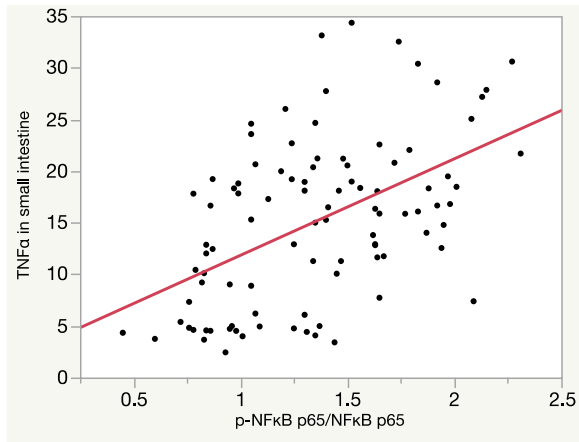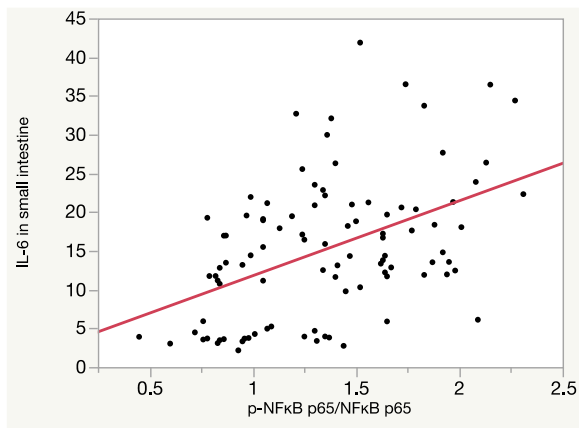

Fig. S4 Bivariate fit of intestinal TNF $\alpha$  and IL-6 by p-NF $\kappa$ B p65/NF $\kappa$ B p65.
